# Supplementary material for: Hyaluronic-Acid-Based Organic-Inorganic Composites for Biomedical Applications
Source: MDPI journal article supplement (doi:10.3390/ma14174982), 2021-08-31
Supplement: s1 [file s1]

Supplementary Materials

# Hyaluronic-Acid-Based Organic–Inorganic Composites for Biomedical Applications

Rebecca Sikkema, Blanca Keohan and Igor Zhitomirsky \*

Department of Materials Science and Engineering, McMaster University, Hamilton, ON L8S4L7, Canada; sikkemar@mcmaster.ca (R.S.); keohanb@mcmaster.ca (B.K.)

\* Correspondence: zhitom@mcmaster.ca (I.Z.)

**Citation:** Sikkema, R.; Keohan, B.; Zhitomirsky, I. Hyaluronic-Acid-Based Organic–Inorganic Composites for Biomedical Applications. *Materials* **2021**, *14*, 4982. <https://doi.org/10.3390/ma14174982>

Academic Editor: Maja Dutour Sikirić

Received: 3 August 2021

Accepted: 27 August 2021

Published: 31 August 2021

**Publisher's Note:** MDPI stays neutral with regard to jurisdictional claims in published maps and institutional affiliations.

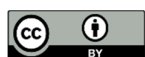

**Copyright:** © 2021 by the authors. Licensee MDPI, Basel, Switzerland. This article is an open access article distributed under the terms and conditions of the Creative Commons Attribution (CC BY) license (<http://creativecommons.org/licenses/by/4.0/>).

**Table S1.** HYH composites, phase content, fabrication methods, performance and references

| Composite | Phase Content                                                          | Fabrication Method                                              | Application                                              | Performance                                                                                     | Reference |
|-----------|------------------------------------------------------------------------|-----------------------------------------------------------------|----------------------------------------------------------|-------------------------------------------------------------------------------------------------|-----------|
| Gel       | HYH-nanoHAP                                                            | Rapid mixing and injection                                      | Bone formation                                           | Improved biocompatibility                                                                       | [22]      |
| Gel       | Bisphosphonate functionalized HYH-CaP                                  | Mixing and non-covalent or covalent cross-linking               | Filling bone defect; Bone regeneration                   | Rapid self-healing; Improved robustness and biodegradability of non-covalently crosslinked gels | [23]      |
| Gel       | Methacrylated gelatin-methacrylated HYH-HAP                            | Crosslinking and 3D printing                                    | Bone 3D bioprinting                                      | Excellent printability and structural integrity                                                 | [36]      |
| Gel       | Pullulan-HYH-HAP                                                       | Mixing and crosslinking                                         | Dermal Rejuvenation                                      | Improved storage modulus, viscosity and long-lasting durability                                 | [37]      |
| Gel       | Glycidyl methacrylate conjugated HYH-nanoCaP                           | Photo-crosslinking and in situ precipitation                    | Soft tissue engineering                                  | Improved mechanical behavior and biostability                                                   | [38]      |
| Gel       | Silk Fibroin-HYH-HAP                                                   | Mixing and crosslinking                                         | Filling irregular bone defects                           | Improves cell growth and survival; increases mechanical strength                                | [39]      |
| Gel       | HYH-microHAP                                                           | Mixing and crosslinking                                         | Soft tissue augmentation                                 | Long-lasting durability; significant improvement in volumetric maintenance                      | [40]      |
| Gel       | Glycol chitosan-HYH-nanoHAP                                            | Mixing via ultrasound                                           | Bone tissue engineering                                  | Excellent biocompatibility and biodegradability                                                 | [41]      |
| Gel       | Thiolated HYH-HAP                                                      | Mixing and crosslinking                                         | Bone tissue engineering                                  | Increase in cell viability and proliferation; improved physical properties                      | [42]      |
| Gel       | HYH-HAP-extracellular matrix microparticles                            | Mixing                                                          | Bone regeneration; bone and cartilage tissue engineering | Increased storage moduli, yield stress and viscoelastic recovery                                | [43]      |
| Gel       | HYH-nanoHAP                                                            | Crosslinking and in situ precipitation                          | Soft tissue augmentation                                 | Great enhancement of dermal matrix; high stiffness and gel cohesiveness                         | [44]      |
| Gel       | HYH-nanoHAP-zolendronate                                               | Mixing and crosslinking                                         | Bone repair and augmentation                             | Induces rapid mineralization; inhibits resorption                                               | [45]      |
| Gel       | Collagen-dimethylsilanediol HYH-nanoHAP-(polyethylenimine or arginine) | Mixing and crosslinking                                         | Bone tissue engineering; gene carrier                    | Significant improvement in compressive modulus; high toughness                                  | [46]      |
| Gel       | HYH-CaP                                                                | Photocrosslinking, in situ precipitation and ionic crosslinking | Hard tissue engineering                                  | Enhanced bioactivity; enhanced mechanical and biological properties                             | [47]      |

|      |                                                      |                                      |                                                         |                                                                                                             |      |
|------|------------------------------------------------------|--------------------------------------|---------------------------------------------------------|-------------------------------------------------------------------------------------------------------------|------|
| Gel  | Alginate-HYH-HAP-exosome                             | Mixing and crosslinking              | Tissue and organ repair                                 | Enhanced bone regeneration and mechanical strength; improved sustained exosome release                      | [48] |
| Gel  | Chitosan-HYH-HAP                                     | Mixing, crosslinking and irradiation | Drug delivery                                           | Improved drug uptake and release capability                                                                 | [49] |
| Gel  | Gelatin-HYH-HAP-calcium sulfate                      | Mixing and crosslinking              | Bone regeneration in bone defects                       | Enhanced bone regeneration; good biocompatibility and biodegradability                                      | [50] |
| Gel  | Pyrogallol conjugated HYH-HAP                        | Poured into mold, mixed and frozen   | Orthopedics; bone tissue engineering                    | Increased osteoconductivity; improved mechanical strength                                                   | [51] |
| Film | HYH-HAP                                              | Electrodeposition                    | Corrosion protection                                    | High deposition rates; Control deposit composition and microstructure                                       | [24] |
| Film | Bioglass-HYH-HAP                                     | Electrophoretic deposition           | Implant coating                                         | Enhanced bioactivity                                                                                        | [55] |
| Film | Bioglass-HYH-nanoHAP                                 | Electrophoretic deposition           | Surface modification of implants; biosensor fabrication | Improved biocompatibility                                                                                   | [56] |
| Film | Halloysite nanotube-HYH-HA                           | Electrophoretic deposition           | Biomedical implants; Drug delivery                      | Improved bioactivity and biocompatibility                                                                   | [57] |
| Film | Multiwalled carbon nanotube-HYH-HAP                  | Electrophoretic deposition           | Corrosion protection                                    | Improved strength and toughness                                                                             | [58] |
| Film | Graphene oxide-HYH-HAP                               | Anodic electrophoretic deposition    | Corrosion protection                                    | Increased deposition rate; Inhibited crack creation and propagation                                         | [59] |
| Film | Chitosan-HYH-HAP-Cellulose nanocrystal               | Layer-by-layer deposition            | Bone scaffold                                           | Increased bioaffinity and biocompatibility; improved surface hydrophilicity; enhanced mechanical properties | [60] |
| Film | Bone morphogenetic protein-2 – HYH-HAP               | Adsorption                           | Implant coating                                         | Increased bone growth                                                                                       | [61] |
| Film | Gantrez-poly(allylamine-co-allylguanidinium)-HYH-HAP | Adsorption                           | Antimicrobial coating                                   | Significant decrease in bacterial viability                                                                 | [62] |
| Film | Bone morphogenetic protein-2 – HYH-HAP               | Adsorption                           | Implant coating                                         | Improved osseointegration                                                                                   | [63] |
| Film | HYH-HAP                                              | Adsorption                           | Bone engineering; Dental applications                   | Improved biocompatibility                                                                                   | [64] |

|          |                                                                                                   |                                                                                             |                                                             |                                                                                                     |      |
|----------|---------------------------------------------------------------------------------------------------|---------------------------------------------------------------------------------------------|-------------------------------------------------------------|-----------------------------------------------------------------------------------------------------|------|
| Film     | Chitosan-HYH-HAP                                                                                  | Sprayed                                                                                     | Antibacterial coatings                                      | High antibacterial activity                                                                         | [65] |
| Scaffold | Gelatin-HYH-CaP                                                                                   | Molding                                                                                     | Bone regeneration                                           | Decreased swelling and degradation rates; increased cell growth and proliferation                   | [66] |
| Scaffold | Chitosan-Collagen-HYH-HAP                                                                         | Freeze-drying, crosslinking and in situ precipitation                                       | Tissue engineering; Regenerative medicine                   | Improved mechanical parameters, thermal stability and porosity                                      | [67] |
| Scaffold | Alginate-HYH-HAP                                                                                  | Crosslinking, freeform 3D printing, crosslinking                                            | Interface tissue engineering                                | Improved mechanical and physiological stability; Accelerated printing method for complex geometries | [68] |
| Scaffold | Chitosan-Collagen-HYH-CaP                                                                         | Freeze-drying, crosslinking and in situ precipitation                                       | Tissue engineering; Regenerative medicine                   | Improved biocompatibility, mechanical parameters, porosity and density                              | [69] |
| Scaffold | Collagen-chitosan-HYH oligosaccharide-HAP-poly(lactic-co-glycolic acid)                           | Crosslinking, freeze-drying and placed in a mold                                            | Bone tissue engineering                                     | High porosity and water uptake capacity                                                             | [70] |
| Scaffold | Polyvinyl alcohol-HYH-HAP                                                                         | Physical crosslinking by freezing-thawing                                                   | Bone tissue engineering                                     | Improved cell proliferation                                                                         | [71] |
| Scaffold | Methoxy poly(ethylene glycol)-block-poly( $\epsilon$ -caprolactone)-glycidyl methacrylate HYH-HAP | Fused deposition modeling method                                                            | Cartilage regeneration; osteoarthritis treatment            | Significantly increased compressive strength                                                        | [72] |
| Scaffold | Gelatin-HYH-CaP                                                                                   | Sponge replica method, sintering, dropwise polymer addition, freeze-drying and crosslinking | Bone regeneration                                           | High interconnected porosity; increase in cell proliferation                                        | [73] |
| Scaffold | Poly( $\gamma$ -glutamic)-HYH-nanoHAP                                                             | Molding                                                                                     | Stem cell differentiation; osteochondral tissue engineering | Good toughness, strength, viscoelasticity, and cytocompatibility                                    | [74] |
| Scaffold | Chitosan-chondroitin sulfate-HYH-HAP                                                              | In situ biomimetic synthesis and freeze-drying                                              | Bone tissue engineering                                     | Good biocompatibility; enhanced osteoblast proliferation and differentiation                        | [75] |
| Scaffold | Chitosan-collagen-HYH-nanoHAP                                                                     | Freeze-drying                                                                               | Regenerative medicine                                       | Improved cell attachment and growth; high porosity                                                  | [76] |
| Scaffold | Chitosan-HYH-nanoHAP                                                                              | Crosslinking, frozen and lyophilized                                                        | Bone repair                                                 | Excellent cell penetration, growth and proliferation                                                | [77] |
| Scaffold | Atelocollagen-HYH-HAP-CaP                                                                         | Chondral phase: crosslinking and molded; Osseous                                            | Osteochondral defect repair                                 | High strength and stiffness                                                                         | [78] |

|           |                                                 |                                                                               |                                                           |                                                                                       |      |
|-----------|-------------------------------------------------|-------------------------------------------------------------------------------|-----------------------------------------------------------|---------------------------------------------------------------------------------------|------|
|           |                                                 | phase: urethane foaming method and sintered                                   |                                                           |                                                                                       |      |
| Scaffold  | Chitosan-collagen-HYH-HAP                       | Crosslinking, frozen and lyophilized                                          | Bone regeneration                                         | Improved mechanical parameters; enhanced biological properties; good biocompatibility | [79] |
| Scaffold  | Chitosan-collagen-HYH-nanoHAP                   | Crosslinking and freeze-drying                                                | Tissue regeneration                                       | Good biocompatibility; highly porous; good stability                                  | [80] |
| Scaffold  | Gelatin-HYH-HAP                                 | Freeze-drying and crosslinking                                                | Dental applications                                       | Excellent hemostatic properties; high rate of collagen distribution                   | [81] |
| Scaffold  | Chitosan-HYH-CaP-bone morphogenetic protein-2   | BCP formation: Sponge replica method, sintered; Polymer: crosslinked, molding | Bone tissue regeneration                                  | Significantly improved mechanical strength; highly porous                             | [82] |
| Biocement | Platelet lysate-HYH-CaP                         | Crosslinking and mixing, self-setting                                         | Alveolar bone regeneration                                | Improved biocompatibility                                                             | [83] |
| Biocement | Chitosan-HYH-HAP                                | Mixing powder and liquid phases                                               | Bone tissue engineering                                   | Good biocompatibility                                                                 | [84] |
| Biocement | Citric acid-HYH-CaP                             | Mixing of powder and liquid phases                                            | Filling bone defects                                      | Good cohesion, compressive strength and sufficient shelf life                         | [85] |
| Biocement | Calcium sulfate hemihydrate-HYH-collagenase-HAP | Mixing of powder and liquid phases                                            | Alveolar bone regeneration                                | Excellent biocompatibility; improved bone formation                                   | [86] |
| Biocement | Platelet lysate-HYH-CaP                         | Mixing of powder and liquid phases                                            | Bone regeneration                                         | Improved mechanical properties, degradability and biological performance              | [87] |
| Biocement | CAP-HYH                                         | Mixing of powder and liquid phases                                            | Filling bone defects                                      | Improved cement cohesion                                                              | [88] |
| Biocement | CAP-HYH                                         | Mixing of powder and liquid phases                                            | Injectable bone filler material                           | Improved cement injectability, improved compressive strength                          | [89] |
| Biocement | CAP-HYH, citric acid additive                   | Mixing of powder and liquid phases                                            | Bone defects healing                                      | Enhanced compressive strength, improved osteoinductivity                              | [90] |
| Biocement | HYH-alginate beads-CAP                          | Synthesis by a spraying method                                                | Injectable bone substitute for improved bone regeneration | Increased injectability and washout resistance                                        | [91] |
| Biocement | CaP-citric acid-sodium bicarbonate-HYNa         | Mixing of powder and liquid phases                                            | Bone repair or reconstruction                             | Enhanced bioactivity                                                                  | [92] |
| Biocement | CAP-HYH-thiol modified with bisphosphonate      | Mixing of powder and liquid phases                                            | Bone repair                                               | Enhanced cohesion                                                                     | [93] |

|                     |                                               |                                                                               |                                         |                                                                                   |       |
|---------------------|-----------------------------------------------|-------------------------------------------------------------------------------|-----------------------------------------|-----------------------------------------------------------------------------------|-------|
| Biocement           | CaP-HYH-tyramine                              | Mixing of powder and liquid phases                                            | Healing of small bone and joint defects | Enhanced mechanical strength                                                      | [94]  |
| Composite particles | CaP-HYH, HAP-HYH                              | Self-assembly and crosslinking                                                | Melanoma tumor therapy                  | Enhanced stability, selective release of functional biomolecules                  | [95]  |
| Composite particles | Oligo-HYH-silica-HAP                          | Multistep nanoparticle formation and surface modification                     | Targeted drug delivery                  | Enhance drug loading, improved pH-responsiveness for drug release                 | [96]  |
| Composite particles | HAP-HYH                                       | Biom mineralization method                                                    | Drug delivery                           | Improved drug release rate                                                        | [97]  |
| Composite particles | Polyethyleneimine stabilized HAP-HYH          | Chemical precipitation and surface modification                               | Targeted drug delivery                  | Enhanced dispersibility, enhanced stability, improved drug release efficiency     | [98]  |
| Composite particles | CaP-dopa-HYH conjugate                        | Chemical precipitation and surface modification                               | Gene delivery                           | Improved stability and enhanced delivery efficiency                               | [99]  |
| Composite particles | HAP-HYH                                       | Surface modification of HAP                                                   | Targeted drug delivery                  | Improved tumor targeting, enhanced delivery efficiency                            | [100] |
| Composite particles | HYH-doped HAP                                 | Biomimetic synthesis and functionalization                                    | Tumor-specific bioimaging               | Enhanced imaging performance                                                      | [101] |
| Composite particles | HYH-CaP                                       | Chemical precipitation and surface modification                               | Tumor targeted therapy                  | Improved si-RNA delivery                                                          | [102] |
| Composite particles | Hollow-HAP-HYH-chitosan                       | Surface modification, hydrothermal synthesis, chemical etching, self-assembly | Targeted drug delivery                  | Improved pH-dependent drug delivery properties                                    | [103] |
| Composite particles | HAP-HYH-chitosan capped with Au nanoparticles | Chemical precipitation and surface modification                               | Remotely triggered drug delivery        | Excellent near-infrared-triggered drug release property                           | [104] |
| Composite particles | HYH/polyethylene glycol-nano-HAP              | Chemical precipitation and surface modification                               | Drug delivery                           | High drug loading efficiency                                                      | [105] |
| Composite gels      | HYH -silica                                   | Sol-gel method                                                                | Soft and hard tissue repair             | Enhanced mechanical properties, improved bioactivity, high degradation resistance | [106] |
| Composite gels      | HYH -silica                                   | Sol-gel method                                                                | Tissue engineering                      | Enhanced thermal stability                                                        | [107] |

|                     |                                                                      |                                                 |                                    |                                                                   |       |
|---------------------|----------------------------------------------------------------------|-------------------------------------------------|------------------------------------|-------------------------------------------------------------------|-------|
| Composite gels      | HYH-chitosan-silica                                                  | Sol-gel method                                  | Tissue engineering                 | Enhanced biocompatibility                                         | [108] |
| Composite gels      | HYH -silica                                                          | Chemical precipitation and surface modification | Tissue engineering                 | Improved mechanical properties                                    | [109] |
| Composite gels      | HYH-silica                                                           | Chemical precipitation and surface modification | Biosensors                         | Enhanced electrochemiluminescence signal for the HYHase detection | [110] |
| Composite gels      | HYH-nPSi                                                             | Solution processing                             | Drug delivery                      | Improved stability and control of drug release                    | [111] |
| Composite gels      | HYH-silica-Au                                                        | Solution processing and surface modification    | Drug delivery for cancer treatment | Improved control of drug release                                  | [112] |
| Composite gels      | HYH-silica                                                           | Colloidal processing and freeze-drying          | Wound healing                      | Improved healing                                                  | [113] |
| Film                | HYH-silica                                                           | Electrophoretic deposition                      | Surface modification of implants   | Improved adhesion and biocompatibility                            | [114] |
| Coating             | HYH-silica                                                           | Sol-gel and electrophoretic deposition          | Surface modification of implants   | Enhanced biolubrication properties                                | [115] |
| Film                | HYH - Poly (6-lysine)-silica                                         | Solution processing                             | Free standing membranes            | Improved film stiffness and biocompatibility                      | [116] |
| Film                | HYH-silica                                                           | Layer-by-layer deposition                       | Drug delivery                      | Enhanced drug loading                                             | [117] |
| Film                | HYH-silica                                                           | Layer-by-layer deposition                       | Drug delivery                      | Controlled drug release speed                                     | [118] |
| Coating             | HYH-collagen-titania nanotubes                                       | Anodization, drop coating                       | Drug delivery                      | Sustained drug release, osseointegration effect                   | [119] |
| Coating             | Methacrylated HYH-titania nanofibers                                 | Electrospinning, drop casting                   | Orthopedic implants                | Improved biocompatibility                                         | [120] |
| Coating             | Titania nanotubes modified with chitosan and alendronate grafted HYH | Spin-assisted layer-by-layer coating            | Drug delivery                      | Enhanced osseointegration                                         | [121] |
| Coating             | Titania nanotubes-HYH-chitosan                                       | Layer-by-layer deposition                       | Orthopedic implants                | Enhanced antibacterial properties, improved drug delivery         | [122] |
| Coating             | Titania nanotubes-dopamine modified HYH-chitosan                     | Anodization, Layer-by-layer deposition          | Orthopedic implants                | Enhanced antibacterial properties, enhanced osseointegration      | [123] |
| Composite particles | HYH-titania                                                          | Sol-gel                                         | Tissue engineering                 | Antifungal activity                                               | [124] |
| Composite particles | HYH-titania                                                          | Solution processing                             | Tissue engineering                 | Anticancer activity                                               | [125] |

|                         |                                               |                                                 |                                                               |                                                                                |       |
|-------------------------|-----------------------------------------------|-------------------------------------------------|---------------------------------------------------------------|--------------------------------------------------------------------------------|-------|
| Coating                 | HYH-titania-carbon dot-Cu <sup>2+</sup>       | Solution processing                             | Biosensor                                                     | Cancer diagnosis, antifouling effect                                           | [126] |
| Scaffold                | HYH-CaCO <sub>3</sub>                         | Solution impregnation                           | Orthopedic implants                                           | Enhanced bone regeneration                                                     | [127] |
| Scaffold                | HYH-chitosan--CaCO <sub>3</sub>               | Solution processing                             | Orthopedic implants                                           | Enhanced mechanical properties, improved cell proliferation                    | [129] |
| Composite particles     | HYH-CaCO <sub>3</sub>                         | Colloidal processing                            | Particles for protein delivery                                | Enhanced protein delivery efficiency                                           | [131] |
| Composite particles     | HYH-alumina                                   | Chemical precipitation and colloidal processing | Liver cancer therapy                                          | Enhanced drug delivery efficiency                                              | [132] |
| Composite membrane      | HYH-alumina                                   | Solution processing                             | Immunosensor for detection of bacterial pathogens             | Efficient pathogens detection                                                  | [133] |
| Composite gel           | HYH-zirconia                                  | Solution processing                             | Implant with controlled release of growth factors or proteins | Improved cell proliferation and differentiation                                | [134] |
| Scaffold                | HYH-gelatin-bioglass                          | Sol-gel and freeze-drying                       | Bone tissue engineering                                       | Improved biocompatibility and bioactivity                                      | [135] |
| Scaffold                | HYH-collagen-bioglass                         | Solution processing                             | Bone tissue engineering                                       | Improved biocompatibility and bioactivity                                      | [136] |
| Injectable biocomposite | HYH- bioglass                                 | Colloidal processing                            | Bone tissue engineering                                       | Improved biocompatibility and bioactivity                                      | [137] |
| Coating                 | HYH-dopamine-conjugate-Ag-doped bioglass      | Layer-by-layer deposition                       | Bone tissue engineering                                       | Enhanced bioactivity and bactericidal properties                               | [138] |
| Coating                 | HYH-catechol functionalized chitosan-bioglass | Dip-coating                                     | Orthopedic implants                                           | Improved biocompatibility and bioactivity                                      | [139] |
| Film                    | HYH-catechol functionalized chitosan-bioglass | Spin-coating layer-by-layer deposition          | Hard tissue regeneration                                      | Improved biocompatibility and bioactivity, improved adhesion, reduced swelling | [140] |
| Film                    | HYH-DOPA-Chitosan-silver-doped bioglass       | Layer-by-layer deposition                       | Bone regeneration                                             | Improved biocompatibility bioactivity, and antibacterial properties            | [141] |
| Composite gel           | Biphosphonate modified HYH-bioglass           | Solution and colloidal processing               | Bone regeneration                                             | Self-healing and bioactive processing                                          | [142] |
| Scaffold                | HYH-bioglass                                  | Solution and colloidal processing               | Bone regeneration                                             | Improved biocompatibility and bioactivity                                      | [143] |
| Composite particles     | HYH-bioglass                                  | Sol-gel                                         | Bioactive paste for bone regeneration                         | Improved bioactivity                                                           | [144] |
| Composite paper         | HYH-curcumin-Ag-chitosan                      | Solution and colloidal processing               | Antibacterial paper                                           | Enhanced antibacterial properties                                              | [145] |
| Composite sponge        | HYH-chitosan-l-glutamic acid-Ag               | Solution and colloidal processing               | Antibacterial sponge                                          | Enhance wound-healing activity                                                 | [146] |



|                              |                            |                                                      |                                     |                                                                       |           |
|------------------------------|----------------------------|------------------------------------------------------|-------------------------------------|-----------------------------------------------------------------------|-----------|
| Composite hydrogel           | HYH-corn silk-Ag           | Microwave-assisted synthesis and solution processing | Wound healing                       | Enhanced wound-healing activity and antimicrobial properties          | [147]     |
| Composite particles          | HYH-Ag                     | Solution and colloidal processing                    | Wound healing                       | Enhanced wound-healing activity and antimicrobial properties          | [148]     |
| Composite sponge             | HYH-chitosan-Ag            | Colloidal processing and freeze-drying               | Wound dressing                      | Enhanced antibacterial properties                                     | [149]     |
| Composite gel                | HYH-alginate-Ag            | Solution and colloidal processing                    | Wound dressing                      | Enhanced antibacterial properties                                     | [150]     |
| Composite membrane           | HYH-polycaprolactone-Ag    | Solution and colloidal processing                    | Healing after tendon surgery        | Prevention of peritendinous adhesion                                  | [151]     |
| Composite films              | HYH-lecithin-Ag            | Solution and colloidal processing                    | Wound dressing                      | Enhanced antibacterial properties                                     | [152,153] |
| Composite fibers and fabrics | HYH-Ag                     | Electrospinning and colloidal processing             | Wound dressing                      | Enhanced biocompatibility and antibacterial properties                | [154-156] |
| Composite fibers and fabrics | HYH-polyvinyl alcohol-Ag   | Electrospinning and colloidal processing             | Skin regeneration and drug delivery | Enhanced biocompatibility, antibacterial and drug delivery properties | [157]     |
| Film                         | HYH-PDDA-Ag                | Layer-by-layer deposition                            | Antimicrobial applications          | Enhanced antimicrobial properties                                     | [158]     |
| Composite fabric             | HYH-chitosan-Ag            | Layer-by-layer deposition and colloidal processing   | Wound dressing                      | Enhanced antimicrobial properties                                     | [159]     |
| Coating                      | HYH-chitosan-Ag            | Solution synthesis and colloidal processing          | Antibacterial surface development   | Enhanced antibacterial properties                                     | [160]     |
| Film                         | HYH-chitosan-Ag            | Layer-by-layer deposition and colloidal processing   | Antibacterial surface development   | Enhanced antibacterial properties                                     | [161]     |
| Film                         | HYH-poly-L-lysine-Ag       | Layer-by-layer deposition and colloidal processing   | Antibacterial surface development   | Enhanced antibacterial properties                                     | [162]     |
| Free standing film           | HYH-poly-L-lysine-Ag       | Layer-by-layer deposition and colloidal processing   | Wound dressing                      | Enhanced antibacterial properties                                     | [163]     |
| Film                         | HYH-polyethylenimine-Ag    | Layer-by-layer deposition and colloidal processing   | Immunoassay application             | Improved fluorescent signal                                           | [164]     |
| Film                         | HYH-chitosan-Ag            | Layer-by-layer deposition and colloidal processing   | Wound dressing                      | Enhanced antibacterial properties                                     | [165]     |
| Injectable hydrogel          | HYH-polyethylene glycol-Au | Solution and colloidal processing                    | Treatment of heart disease          | Enhanced biocompatibility                                             | [166]     |
| Nanofiber meshes             | HYH-collagen-Au            | Electrospinning and colloidal processing             | Tissue engineering                  | Enhanced biocompatibility                                             | [167]     |
| Composite particles          | HYH-polylysine-Au          | Solution and colloidal processing                    | Tissue engineering                  | Improved cellular adhesion and biocompatibility                       | [168]     |

|                     |                                   |                                                            |                                          |                                                                          |       |
|---------------------|-----------------------------------|------------------------------------------------------------|------------------------------------------|--------------------------------------------------------------------------|-------|
| Composite particles | HYH-Au nanorod                    | Solution synthesis and colloidal processing                | Diagnosis, imaging and therapy of cancer | Advanced optical and absorption properties                               | [169] |
| Film                | HYH-poly-l-lysine-Au              | Solution synthesis and colloidal processing                | Cell culture applications                | Enhanced film stiffness, enhanced cell adhesion                          | [170] |
| Film                | HYH-poly-l-lysine-Au              | Layer-by-layer deposition and colloidal processing         | Implant biocoating, tissue engineering   | Enhanced near-IR absorption, biocompatibility                            | [171] |
| Film                | HYH-poly-l-lysine-Au              | Layer-by-layer deposition and colloidal processing         | Biosensors, drug delivery                | Improved biocompatibility, homogeneous composition, drug storage ability | [172] |
| Scaffold            | HYH-collagen-CdSe/ZnS quantum dot | Solution synthesis and colloidal processing, freeze drying | Biosensors                               | Enhanced biocompatibility                                                | [173] |
| Scaffold            | HYH-collagen-quantum dot          | Solution synthesis and colloidal processing                | Tissue engineering                       | Enhanced biocompatibility and fluorescence                               | [174] |
| Film                | HYH-ZnS/CdSe quantum dot          | Layer-by-layer deposition and colloidal processing         | Sensors                                  | Enhanced biocompatibility and fluorescence                               | [175] |
| Film                | HYH-ZnS and HYH-CdSe quantum dots | Colloidal processing                                       | Fluorescent labels and probes            | Enhanced biocompatibility and fluorescence                               | [176] |
